# Supplementary material
Source: publisher figshare collection journal article supplement (https://gsajournals.figshare.com/ndownloader/files/26673392)
Supplement: Supplementary file 1 [file 26673392]

## Sheet: Sheet1
Supplementary Table S5. primer sequences used for the tailed miRNA qRT-PCR.
miRNA	Primer sequence (5' -> 3')	Bases
Actin (control)	TGCGTGTCGTGGAGTCG	17
egd-miR156a-3p	CGGTGCTCACTTCTCTTCTGTCAGT	25
egd-miR390a-3p	CGCGCTATCCATCCTGAGTTTCA	23
egd-miR396d-3p	CCGTTCAAGCTAGCTGTGGGAAG	23
egd-miR482b-3p	TCTTCCCTGTTCCGCCCATTC	21
egd-N-miR1-5p	AGGCTCAGGACAATGCCCATT	21
egd-N-miR18-5p	CGGTTCTCAGCTTTGGCCTCTTTTT	25
egd-N-miR6-3p	CGCGCATTATCAGCCTTCTCATCTTG	26
